# Supplementary material for: Tinnitus: Characteristics, Need for Therapy, and Therapeutic Outcomes; Results of an International Patient Initiated Platform
Source: Frontiers journal article supplement (doi:10.3389/fneur.2021.778450), 2022-01-20
Supplement: Data_Sheet_1.PDF [file Data_Sheet_1.PDF]

### About you

**\* 1. Are you...**

- ☐ Male
- ☐ Female
- ☐ Transgender
- ☐ Prefer not to say

**\* 2. Please let us know your age.**

- ☐ Under 18
- ☐ 18-24
- ☐ 25-34
- ☐ 35-44
- ☐ 45-54
- ☐ 55-64
- ☐ 65-74
- ☐ 75+
- ☐ Prefer not to say

**\* 3. How long have you had tinnitus for?**  
(when did it first begin?)

- ☐ Less than 3 months
- ☐ 4-6 months
- ☐ 6-12 months
- ☐ 1-2 years
- ☐ 2-3 years
- ☐ 3-5 years
- ☐ 5-10 years
- ☐ 10-20 years
- ☐ 20+ years

About your tinnitus

**\* 4. What is the primary cause of your tinnitus?**

(think of the main thing, what set it off when you first noticed it?)

**\* 5. Can you identify a secondary cause for your tinnitus?**

☐ Yes

☐ No

About your tinnitus (continued)

**\* 6. What is the secondary cause of your tinnitus?**

**\* 7. Can you identify a tertiary (third) cause for your tinnitus?**

☐ Yes

☐ No

About your tinnitus (continued)

**\* 8. What is the tertiary cause of your tinnitus?**

Noise and Somatic

**\* 9. Is your tinnitus reactive to noise?**

- ☐ Mixture - some sounds make it better and some make it worse
- ☐ Some sounds make it a lot worse
- ☐ Some sounds make it a little worse
- ☐ Sounds don't really affect me
- ☐ Some sounds make it a little better
- ☐ Some sounds make it a lot better
- ☐ I don't know

**\* 10. Do you have hyperacusis?**

(hyperacusis is a sensitivity to sounds, often you will think sounds are irritating and painfully loud when others hear them as normal)

- ☐ No
- ☐ Mildly
- ☐ Moderately
- ☐ Severely
- ☐ Don't know

**\* 11. Do you have pulsatile tinnitus?**

(tinnitus that is rhythmic, generally in time with the heartbeat - often a whooshing or pulsing)

- ☐ Yes
- ☐ No
- ☐ Unsure

**\* 12. Do you have somatic tinnitus?**

(this means you can change the volume, for example by clenching teeth or moving the jaw or neck)

- ☐ Yes
- ☐ No
- ☐ Don't know

**\* 13. Do you have problems with your jaw or neck?**

**(think about the past week)**

- ☐ Problems with jaw
- ☐ Problems with neck
- ☐ Problems with jaw and neck
- ☐ None

Your hearing

**\* 14. Do you have any hearing loss?**

- ☐ None known of
- ☐ Mild hearing loss  
(may struggle a little to keep up with conversations)
- ☐ Moderate hearing loss  
(generally struggle to keep up with conversations without a hearing aid)
- ☐ Severe hearing loss  
(often rely on lip reading as well as hearing aids to keep up with conversation)

Your hearing (continued)

\* 15. Is your hearing loss in...

- ☐ One ear
- ☐ Both ears

\* 16. What is the main frequency range of your hearing loss?

(phone users - scroll horizontally to see all choices)

|           | Unsure                | Low / mid (up to 1kHz) | Mid (1kHz-3kHz)       | Mid / high (4kHz-8kHz) | Very high (8kHz+)     | Several dips in hearing |
|-----------|-----------------------|------------------------|-----------------------|------------------------|-----------------------|-------------------------|
| Frequency | <input type="radio"/> | <input type="radio"/>  | <input type="radio"/> | <input type="radio"/>  | <input type="radio"/> | <input type="radio"/>   |



Treatments

**\* 17. Have you tried any treatments for your tinnitus?**

(think of masking, pharmacological, physical treatments as well as specialist tinnitus treatments)

☐ Yes

☐ No

Treatments (continued)

**\* 18. Which treatments have you tried?**

**(select all that apply)**

- ☐ TRT (Tinnitus Retraining Therapy)
- ☐ In-ear maskers (not as part of TRT program)
- ☐ CBT (Cognitive Behavioural Therapy)
- ☐ Psychiatrist
- ☐ Psychologist
- ☐ Neuromonics
- ☐ SoundCure
- ☐ Acoustic Neuromodulation
- ☐ Notched music therapy
- ☐ Hearing aid
- ☐ Self-administered sound therapy (masking, nature sounds)
- ☐ Bio / Neuro feedback, meditation
- ☐ Antidepressants
- ☐ GABA type drugs
- ☐ Retigabine (Trobal / Potiga)
- ☐ Transcranial Stimulation Treatments (rTMS, tDCS, tACS)
- ☐ HBOT (Hyperbaric Oxygen Therapy)
- ☐ Steroids
- ☐ Low-Level Laser Treatment (LLLT)
- ☐ Off-label medication
- ☐ Surgical procedure
- ☐ Acupuncture
- ☐ Chiropractor
- ☐ Supplements / herbal medicines
- ☐ Tinnitus cure eBooks
- ☐ Homeopathic treatment
- ☐ Other (please specify)

## Treatments (continued)

**\* 19. How effective was each treatment for you?**

(phone users - scroll horizontally to see all choices)

|                                                          | Big improvement       | Small improvement     | No change             | Made me slightly worse | Made me a lot worse   |
|----------------------------------------------------------|-----------------------|-----------------------|-----------------------|------------------------|-----------------------|
| TRT (Tinnitus Retraining Therapy)                        | <input type="radio"/> | <input type="radio"/> | <input type="radio"/> | <input type="radio"/>  | <input type="radio"/> |
| In-ear maskers (not as part of TRT program)              | <input type="radio"/> | <input type="radio"/> | <input type="radio"/> | <input type="radio"/>  | <input type="radio"/> |
| CBT (Cognitive Behavioural Therapy)                      | <input type="radio"/> | <input type="radio"/> | <input type="radio"/> | <input type="radio"/>  | <input type="radio"/> |
| Psychiatrist                                             | <input type="radio"/> | <input type="radio"/> | <input type="radio"/> | <input type="radio"/>  | <input type="radio"/> |
| Psychologist                                             | <input type="radio"/> | <input type="radio"/> | <input type="radio"/> | <input type="radio"/>  | <input type="radio"/> |
| Neuromonics                                              | <input type="radio"/> | <input type="radio"/> | <input type="radio"/> | <input type="radio"/>  | <input type="radio"/> |
| SoundCure                                                | <input type="radio"/> | <input type="radio"/> | <input type="radio"/> | <input type="radio"/>  | <input type="radio"/> |
| Acoustic Neuromodulation                                 | <input type="radio"/> | <input type="radio"/> | <input type="radio"/> | <input type="radio"/>  | <input type="radio"/> |
| Notched music therapy                                    | <input type="radio"/> | <input type="radio"/> | <input type="radio"/> | <input type="radio"/>  | <input type="radio"/> |
| Hearing aid                                              | <input type="radio"/> | <input type="radio"/> | <input type="radio"/> | <input type="radio"/>  | <input type="radio"/> |
| Self-administered sound therapy (masking, nature sounds) | <input type="radio"/> | <input type="radio"/> | <input type="radio"/> | <input type="radio"/>  | <input type="radio"/> |
| Bio / Neuro feedback, meditation                         | <input type="radio"/> | <input type="radio"/> | <input type="radio"/> | <input type="radio"/>  | <input type="radio"/> |
| Antidepressants                                          | <input type="radio"/> | <input type="radio"/> | <input type="radio"/> | <input type="radio"/>  | <input type="radio"/> |
| GABA type drugs                                          | <input type="radio"/> | <input type="radio"/> | <input type="radio"/> | <input type="radio"/>  | <input type="radio"/> |
| Retigabine (Trobal / Potiga)                             | <input type="radio"/> | <input type="radio"/> | <input type="radio"/> | <input type="radio"/>  | <input type="radio"/> |
| Transcranial Stimulation Treatments (rTMS, tDCS, tACS)   | <input type="radio"/> | <input type="radio"/> | <input type="radio"/> | <input type="radio"/>  | <input type="radio"/> |

|                                  | Big improvement       | Small improvement     | No change             | Made me slightly worse | Made me a lot worse   |
|----------------------------------|-----------------------|-----------------------|-----------------------|------------------------|-----------------------|
| HBOT (Hyperbaric Oxygen Therapy) | <input type="radio"/> | <input type="radio"/> | <input type="radio"/> | <input type="radio"/>  | <input type="radio"/> |
| Steroids                         | <input type="radio"/> | <input type="radio"/> | <input type="radio"/> | <input type="radio"/>  | <input type="radio"/> |
| Low-Level Laser Treatment (LLLT) | <input type="radio"/> | <input type="radio"/> | <input type="radio"/> | <input type="radio"/>  | <input type="radio"/> |
| Off-label medication             | <input type="radio"/> | <input type="radio"/> | <input type="radio"/> | <input type="radio"/>  | <input type="radio"/> |
| Surgical procedure               | <input type="radio"/> | <input type="radio"/> | <input type="radio"/> | <input type="radio"/>  | <input type="radio"/> |
| Acupuncture                      | <input type="radio"/> | <input type="radio"/> | <input type="radio"/> | <input type="radio"/>  | <input type="radio"/> |
| Chiropractor                     | <input type="radio"/> | <input type="radio"/> | <input type="radio"/> | <input type="radio"/>  | <input type="radio"/> |
| Supplements / herbal medicines   | <input type="radio"/> | <input type="radio"/> | <input type="radio"/> | <input type="radio"/>  | <input type="radio"/> |
| Tinnitus cure eBooks             | <input type="radio"/> | <input type="radio"/> | <input type="radio"/> | <input type="radio"/>  | <input type="radio"/> |
| Homeopathic treatment            | <input type="radio"/> | <input type="radio"/> | <input type="radio"/> | <input type="radio"/>  | <input type="radio"/> |
| Other (please specify)           | <input type="radio"/> | <input type="radio"/> | <input type="radio"/> | <input type="radio"/>  | <input type="radio"/> |

**\* 20. How long did you try each treatment for?**  
(phone users - scroll horizontally to see all choices)

|                                             | Currently trying this treatment | Less than 1 month     | 1-2 months            | 2-4 months            | 4-6 months            | More than 6 months    |
|---------------------------------------------|---------------------------------|-----------------------|-----------------------|-----------------------|-----------------------|-----------------------|
| TRT (Tinnitus Retraining Therapy)           | <input type="radio"/>           | <input type="radio"/> | <input type="radio"/> | <input type="radio"/> | <input type="radio"/> | <input type="radio"/> |
| In-ear maskers (not as part of TRT program) | <input type="radio"/>           | <input type="radio"/> | <input type="radio"/> | <input type="radio"/> | <input type="radio"/> | <input type="radio"/> |
| CBT (Cognitive Behavioural Therapy)         | <input type="radio"/>           | <input type="radio"/> | <input type="radio"/> | <input type="radio"/> | <input type="radio"/> | <input type="radio"/> |
| Psychiatrist                                | <input type="radio"/>           | <input type="radio"/> | <input type="radio"/> | <input type="radio"/> | <input type="radio"/> | <input type="radio"/> |
| Psychologist                                | <input type="radio"/>           | <input type="radio"/> | <input type="radio"/> | <input type="radio"/> | <input type="radio"/> | <input type="radio"/> |
| Neuromonics                                 | <input type="radio"/>           | <input type="radio"/> | <input type="radio"/> | <input type="radio"/> | <input type="radio"/> | <input type="radio"/> |
| SoundCure                                   | <input type="radio"/>           | <input type="radio"/> | <input type="radio"/> | <input type="radio"/> | <input type="radio"/> | <input type="radio"/> |
| Acoustic Neuromodulation                    | <input type="radio"/>           | <input type="radio"/> | <input type="radio"/> | <input type="radio"/> | <input type="radio"/> | <input type="radio"/> |
| Notched music therapy                       | <input type="radio"/>           | <input type="radio"/> | <input type="radio"/> | <input type="radio"/> | <input type="radio"/> | <input type="radio"/> |

|                                                                   | Currently<br>trying this<br>treatment | Less than 1<br>month  | 1-2 months            | 2-4 months            | 4-6 months            | More than 6<br>months |
|-------------------------------------------------------------------|---------------------------------------|-----------------------|-----------------------|-----------------------|-----------------------|-----------------------|
| Hearing aid                                                       | <input type="radio"/>                 | <input type="radio"/> | <input type="radio"/> | <input type="radio"/> | <input type="radio"/> | <input type="radio"/> |
| Self-administered<br>sound therapy<br>(masking, nature<br>sounds) | <input type="radio"/>                 | <input type="radio"/> | <input type="radio"/> | <input type="radio"/> | <input type="radio"/> | <input type="radio"/> |
| Bio / Neuro feedback,<br>meditation                               | <input type="radio"/>                 | <input type="radio"/> | <input type="radio"/> | <input type="radio"/> | <input type="radio"/> | <input type="radio"/> |
| Antidepressants                                                   | <input type="radio"/>                 | <input type="radio"/> | <input type="radio"/> | <input type="radio"/> | <input type="radio"/> | <input type="radio"/> |
| GABA type drugs                                                   | <input type="radio"/>                 | <input type="radio"/> | <input type="radio"/> | <input type="radio"/> | <input type="radio"/> | <input type="radio"/> |
| Retigabine (Trobalt /<br>Potiga)                                  | <input type="radio"/>                 | <input type="radio"/> | <input type="radio"/> | <input type="radio"/> | <input type="radio"/> | <input type="radio"/> |
| Transcranial<br>Stimulation<br>Treatments (rTMS,<br>tDCS, tACS)   | <input type="radio"/>                 | <input type="radio"/> | <input type="radio"/> | <input type="radio"/> | <input type="radio"/> | <input type="radio"/> |
| HBOT (Hyperbaric<br>Oxygen Therapy)                               | <input type="radio"/>                 | <input type="radio"/> | <input type="radio"/> | <input type="radio"/> | <input type="radio"/> | <input type="radio"/> |
| Steroids                                                          | <input type="radio"/>                 | <input type="radio"/> | <input type="radio"/> | <input type="radio"/> | <input type="radio"/> | <input type="radio"/> |
| Low-Level Laser<br>Treatment (LLLT)                               | <input type="radio"/>                 | <input type="radio"/> | <input type="radio"/> | <input type="radio"/> | <input type="radio"/> | <input type="radio"/> |
| Off-label medication                                              | <input type="radio"/>                 | <input type="radio"/> | <input type="radio"/> | <input type="radio"/> | <input type="radio"/> | <input type="radio"/> |
| Surgical procedure                                                | <input type="radio"/>                 | <input type="radio"/> | <input type="radio"/> | <input type="radio"/> | <input type="radio"/> | <input type="radio"/> |
| Acupuncture                                                       | <input type="radio"/>                 | <input type="radio"/> | <input type="radio"/> | <input type="radio"/> | <input type="radio"/> | <input type="radio"/> |
| Chiropractor                                                      | <input type="radio"/>                 | <input type="radio"/> | <input type="radio"/> | <input type="radio"/> | <input type="radio"/> | <input type="radio"/> |
| Supplements / herbal<br>medicines                                 | <input type="radio"/>                 | <input type="radio"/> | <input type="radio"/> | <input type="radio"/> | <input type="radio"/> | <input type="radio"/> |
| Tinnitus cure eBooks                                              | <input type="radio"/>                 | <input type="radio"/> | <input type="radio"/> | <input type="radio"/> | <input type="radio"/> | <input type="radio"/> |
| Homeopathic<br>treatment                                          | <input type="radio"/>                 | <input type="radio"/> | <input type="radio"/> | <input type="radio"/> | <input type="radio"/> | <input type="radio"/> |
| Other (please specify)                                            | <input type="radio"/>                 | <input type="radio"/> | <input type="radio"/> | <input type="radio"/> | <input type="radio"/> | <input type="radio"/> |

**\* 21. When did you last try each treatment?**  
 (phone users - scroll horizontally to see all choices)

|                                                          | Currently<br>undergoing this<br>treatment | Less than 3<br>months ago | 3-6 months ago        | 6-12 months ago       | More than 1 year<br>ago |
|----------------------------------------------------------|-------------------------------------------|---------------------------|-----------------------|-----------------------|-------------------------|
| TRT (Tinnitus Retraining Therapy)                        | <input type="radio"/>                     | <input type="radio"/>     | <input type="radio"/> | <input type="radio"/> | <input type="radio"/>   |
| In-ear maskers (not as part of TRT program)              | <input type="radio"/>                     | <input type="radio"/>     | <input type="radio"/> | <input type="radio"/> | <input type="radio"/>   |
| CBT (Cognitive Behavioural Therapy)                      | <input type="radio"/>                     | <input type="radio"/>     | <input type="radio"/> | <input type="radio"/> | <input type="radio"/>   |
| Psychiatrist                                             | <input type="radio"/>                     | <input type="radio"/>     | <input type="radio"/> | <input type="radio"/> | <input type="radio"/>   |
| Psychologist                                             | <input type="radio"/>                     | <input type="radio"/>     | <input type="radio"/> | <input type="radio"/> | <input type="radio"/>   |
| Neuromonics                                              | <input type="radio"/>                     | <input type="radio"/>     | <input type="radio"/> | <input type="radio"/> | <input type="radio"/>   |
| SoundCure                                                | <input type="radio"/>                     | <input type="radio"/>     | <input type="radio"/> | <input type="radio"/> | <input type="radio"/>   |
| Acoustic Neuromodulation                                 | <input type="radio"/>                     | <input type="radio"/>     | <input type="radio"/> | <input type="radio"/> | <input type="radio"/>   |
| Notched music therapy                                    | <input type="radio"/>                     | <input type="radio"/>     | <input type="radio"/> | <input type="radio"/> | <input type="radio"/>   |
| Hearing aid                                              | <input type="radio"/>                     | <input type="radio"/>     | <input type="radio"/> | <input type="radio"/> | <input type="radio"/>   |
| Self-administered sound therapy (masking, nature sounds) | <input type="radio"/>                     | <input type="radio"/>     | <input type="radio"/> | <input type="radio"/> | <input type="radio"/>   |
| Bio / Neuro feedback, meditation                         | <input type="radio"/>                     | <input type="radio"/>     | <input type="radio"/> | <input type="radio"/> | <input type="radio"/>   |
| Antidepressants                                          | <input type="radio"/>                     | <input type="radio"/>     | <input type="radio"/> | <input type="radio"/> | <input type="radio"/>   |
| GABA type drugs                                          | <input type="radio"/>                     | <input type="radio"/>     | <input type="radio"/> | <input type="radio"/> | <input type="radio"/>   |
| Retigabine (Trobal / Potiga)                             | <input type="radio"/>                     | <input type="radio"/>     | <input type="radio"/> | <input type="radio"/> | <input type="radio"/>   |
| Transcranial Stimulation Treatments (rTMS, tDCS, tACS)   | <input type="radio"/>                     | <input type="radio"/>     | <input type="radio"/> | <input type="radio"/> | <input type="radio"/>   |
| HBOT (Hyperbaric Oxygen Therapy)                         | <input type="radio"/>                     | <input type="radio"/>     | <input type="radio"/> | <input type="radio"/> | <input type="radio"/>   |
| Steroids                                                 | <input type="radio"/>                     | <input type="radio"/>     | <input type="radio"/> | <input type="radio"/> | <input type="radio"/>   |
| Low-Level Laser Treatment (LLLT)                         | <input type="radio"/>                     | <input type="radio"/>     | <input type="radio"/> | <input type="radio"/> | <input type="radio"/>   |
| Off-label medication                                     | <input type="radio"/>                     | <input type="radio"/>     | <input type="radio"/> | <input type="radio"/> | <input type="radio"/>   |

|                                   | Currently<br>undergoing this<br>treatment | Less than 3<br>months ago | 3-6 months ago        | 6-12 months ago       | More than 1 year<br>ago |
|-----------------------------------|-------------------------------------------|---------------------------|-----------------------|-----------------------|-------------------------|
| Surgical procedure                | <input type="radio"/>                     | <input type="radio"/>     | <input type="radio"/> | <input type="radio"/> | <input type="radio"/>   |
| Acupuncture                       | <input type="radio"/>                     | <input type="radio"/>     | <input type="radio"/> | <input type="radio"/> | <input type="radio"/>   |
| Chiropractor                      | <input type="radio"/>                     | <input type="radio"/>     | <input type="radio"/> | <input type="radio"/> | <input type="radio"/>   |
| Supplements / herbal<br>medicines | <input type="radio"/>                     | <input type="radio"/>     | <input type="radio"/> | <input type="radio"/> | <input type="radio"/>   |
| Tinnitus cure eBooks              | <input type="radio"/>                     | <input type="radio"/>     | <input type="radio"/> | <input type="radio"/> | <input type="radio"/>   |
| Homeopathic<br>treatment          | <input type="radio"/>                     | <input type="radio"/>     | <input type="radio"/> | <input type="radio"/> | <input type="radio"/>   |
| Other (please specify)            | <input type="radio"/>                     | <input type="radio"/>     | <input type="radio"/> | <input type="radio"/> | <input type="radio"/>   |



Your health

**\* 22. Did you have any pre-existing health conditions before the onset of tinnitus?**

(select all that apply)

☐ No existing health conditions

☐ Stress

☐ Anxiety

☐ Depression

☐ Panic attacks

☐ OCD type conditions

☐ Jaw or neck problems

☐ Physical disability

☐ Alcohol abuse

☐ Drug abuse

☐ Other (please specify)

## Your health (continued)

## \* 23. Has tinnitus had an effect on these conditions?

(phone users - scroll horizontally to see all choices)

|                               | Made a lot worse      | Made a little worse   | No difference         | Made a little better  | Made a lot better     |
|-------------------------------|-----------------------|-----------------------|-----------------------|-----------------------|-----------------------|
| No existing health conditions | <input type="radio"/> | <input type="radio"/> | <input type="radio"/> | <input type="radio"/> | <input type="radio"/> |
| Stress                        | <input type="radio"/> | <input type="radio"/> | <input type="radio"/> | <input type="radio"/> | <input type="radio"/> |
| Anxiety                       | <input type="radio"/> | <input type="radio"/> | <input type="radio"/> | <input type="radio"/> | <input type="radio"/> |
| Depression                    | <input type="radio"/> | <input type="radio"/> | <input type="radio"/> | <input type="radio"/> | <input type="radio"/> |
| Panic attacks                 | <input type="radio"/> | <input type="radio"/> | <input type="radio"/> | <input type="radio"/> | <input type="radio"/> |
| OCD type conditions           | <input type="radio"/> | <input type="radio"/> | <input type="radio"/> | <input type="radio"/> | <input type="radio"/> |
| Jaw or neck problems          | <input type="radio"/> | <input type="radio"/> | <input type="radio"/> | <input type="radio"/> | <input type="radio"/> |
| Physical disability           | <input type="radio"/> | <input type="radio"/> | <input type="radio"/> | <input type="radio"/> | <input type="radio"/> |
| Alcohol abuse                 | <input type="radio"/> | <input type="radio"/> | <input type="radio"/> | <input type="radio"/> | <input type="radio"/> |
| Drug abuse                    | <input type="radio"/> | <input type="radio"/> | <input type="radio"/> | <input type="radio"/> | <input type="radio"/> |
| Other (please specify)        | <input type="radio"/> | <input type="radio"/> | <input type="radio"/> | <input type="radio"/> | <input type="radio"/> |

Your health (continued)

**\* 24. Has tinnitus caused you any health-related conditions?**

(select all that apply)

- ☐ No health conditions caused
- ☐ Stress
- ☐ Anxiety
- ☐ Panic attacks
- ☐ Depression
- ☐ OCD type condition
- ☐ Insomnia
- ☐ Concentration / focus problems
- ☐ Alcohol abuse
- ☐ Drug abuse
- ☐ Other (please specify)

Your health (continued)

**\* 25. Do any of the following dietary items have an effect on your tinnitus?**

(select all that apply)

☐ Dietary items do not have an effect

☐ Caffeine

☐ Sugar

☐ Salt

☐ Spices / spicy food

☐ MSG (Monosodium glutamate)

☐ Fatty (junk / takeaway) foods

☐ Alcohol

☐ Citrus

☐ Chocolate

☐ Red meat

☐ Other (please specify)

## Your health (continued)

**\* 26. What effect do they have?**

(phone users scroll along to see all choices)

|                                     | Make it a lot worse   | Make it a little worse | Make it a little better | Make it a lot better  |
|-------------------------------------|-----------------------|------------------------|-------------------------|-----------------------|
| Dietary items do not have an effect | <input type="radio"/> | <input type="radio"/>  | <input type="radio"/>   | <input type="radio"/> |
| Caffeine                            | <input type="radio"/> | <input type="radio"/>  | <input type="radio"/>   | <input type="radio"/> |
| Sugar                               | <input type="radio"/> | <input type="radio"/>  | <input type="radio"/>   | <input type="radio"/> |
| Salt                                | <input type="radio"/> | <input type="radio"/>  | <input type="radio"/>   | <input type="radio"/> |
| Spices / spicy food                 | <input type="radio"/> | <input type="radio"/>  | <input type="radio"/>   | <input type="radio"/> |
| MSG (Monosodium glutamate)          | <input type="radio"/> | <input type="radio"/>  | <input type="radio"/>   | <input type="radio"/> |
| Fatty (junk / takeaway) foods       | <input type="radio"/> | <input type="radio"/>  | <input type="radio"/>   | <input type="radio"/> |
| Alcohol                             | <input type="radio"/> | <input type="radio"/>  | <input type="radio"/>   | <input type="radio"/> |
| Citrus                              | <input type="radio"/> | <input type="radio"/>  | <input type="radio"/>   | <input type="radio"/> |
| Chocolate                           | <input type="radio"/> | <input type="radio"/>  | <input type="radio"/>   | <input type="radio"/> |
| Red meat                            | <input type="radio"/> | <input type="radio"/>  | <input type="radio"/>   | <input type="radio"/> |
| Other (please specify)              | <input type="radio"/> | <input type="radio"/>  | <input type="radio"/>   | <input type="radio"/> |

About your tinnitus  
- Last page YEAH!

**\* 27. Did you know what tinnitus was before you got it?**

- ☐ Yes
- ☐ Had heard of it but didn't really understand
- ☐ No

**\* 28. Where do you perceive your tinnitus?**

- ☐ One ear
- ☐ Both ears
- ☐ More in the brain
- ☐ In the ear/s and the brain
- ☐ Not sure

**29. How does your tinnitus behave during the day?**

- ☐ It's better in the morning
- ☐ It's better in the evening
- ☐ It fluctuates but there is no pattern
- ☐ It doesn't change at all

**\* 30. How often have you heard your tinnitus in the last week?**

(phone users - scroll horizontally to see all choices)

| Not heard<br>it       | 1                     | 2                     | 3                     | 4                     | 5                     | 6                     | 7                     | 8                     | 9                     | Heard it<br>constantly |
|-----------------------|-----------------------|-----------------------|-----------------------|-----------------------|-----------------------|-----------------------|-----------------------|-----------------------|-----------------------|------------------------|
| <input type="radio"/> | <input type="radio"/> | <input type="radio"/> | <input type="radio"/> | <input type="radio"/> | <input type="radio"/> | <input type="radio"/> | <input type="radio"/> | <input type="radio"/> | <input type="radio"/> | <input type="radio"/>  |

**\* 31. How often has your tinnitus bothered you over the last week?**

(phone users - scroll horizontally to see all choices)

| Not<br>bothered<br>me at all | 1                     | 2                     | 3                     | 4                     | 5                     | 6                     | 7                     | 8                     | 9                     | Bothered<br>me<br>constantly |
|------------------------------|-----------------------|-----------------------|-----------------------|-----------------------|-----------------------|-----------------------|-----------------------|-----------------------|-----------------------|------------------------------|
| <input type="radio"/>        | <input type="radio"/> | <input type="radio"/> | <input type="radio"/> | <input type="radio"/> | <input type="radio"/> | <input type="radio"/> | <input type="radio"/> | <input type="radio"/> | <input type="radio"/> | <input type="radio"/>        |

**\* 32. How often has your tinnitus increased feelings of frustration over the last week?**

(phone users - scroll horizontally to see all choices)

|                       |                       |                       |                       |                       |                       |                       |                       |                       |                       |                       |
|-----------------------|-----------------------|-----------------------|-----------------------|-----------------------|-----------------------|-----------------------|-----------------------|-----------------------|-----------------------|-----------------------|
| No<br>frustration     | 1                     | 2                     | 3                     | 4                     | 5                     | 6                     | 7                     | 8                     | 9                     | Constant frustration  |
| <input type="radio"/> | <input type="radio"/> | <input type="radio"/> | <input type="radio"/> | <input type="radio"/> | <input type="radio"/> | <input type="radio"/> | <input type="radio"/> | <input type="radio"/> | <input type="radio"/> | <input type="radio"/> |

**33. Please enter your email if you would like to take part in future surveys and make your voice heard amongst the research community**

Your details will be kept safe and you can opt out at any time - no spam and we'll ask first before including you on any surveys

Email Address
